# Supplementary material for: Green-Synthesized Iron Oxide-Chitosan Nanocomposite for Chromium and Nanoplastics Remediation
Source: Research Square preprint supplement (doi:10.21203/rs.3.rs-7609084/v1), 2025-10-29
Supplement: Supplementary file 1 [file c167d527e98e726da9918024.docx]

**Supplementary information**

**Green-Synthesized Iron Oxide-Chitosan Nanocomposite for Chromium and Nanoplastics Remediation**

Shouvik Mahanty1,2, Gopala Krishna Darbha2,3*, Richard Paul4, Ramin Boroujerdi4, Eugenia Valsami-Jones5, Santanu Majumder4*

*1Department of Atomic Energy, Saha Institute of Nuclear Physics, Sector 1, AF Block, Bidhannagar, Kolkata 700064, West Bengal, India*

*2Environmental Nanoscience Laboratory, Department of Earth Sciences, IISER Kolkata, Mohanpur, West Bengal, Pincode- 741246, India*

*3Center for Climate & Environmental Studies, IISER Kolkata, Mohanpur, West Bengal, Pincode- 741246, India*

*4Department of Life and Environmental Sciences, Bournemouth University (Talbot Campus), Fern Barrow, Poole BH12 5BB, UK*

*5School of Geography, Earth and Environmental Sciences, University of Birmingham, Edgbaston, Birmingham B15 2TT, UK*

****Corresponding Authors***

Dr. Gopala Krishna Darbha, Associate Professor, Indian Institute of Science Education and Research (IISER) Kolkata, Mohanpur, West Bengal, Pin- 741246, India

Email: [gkdarbha@iiserkol.ac.in](mailto:gkdarbha@iiserkol.ac.in)

Dr. Santanu Majumder, Department of Life and Environmental Sciences, Bournemouth University (Talbot Campus), Fern Barrow, Poole BH125BB, UK

Email: [smajumder@bournemouth.ac.uk](mailto:smajumder@bournemouth.ac.uk)


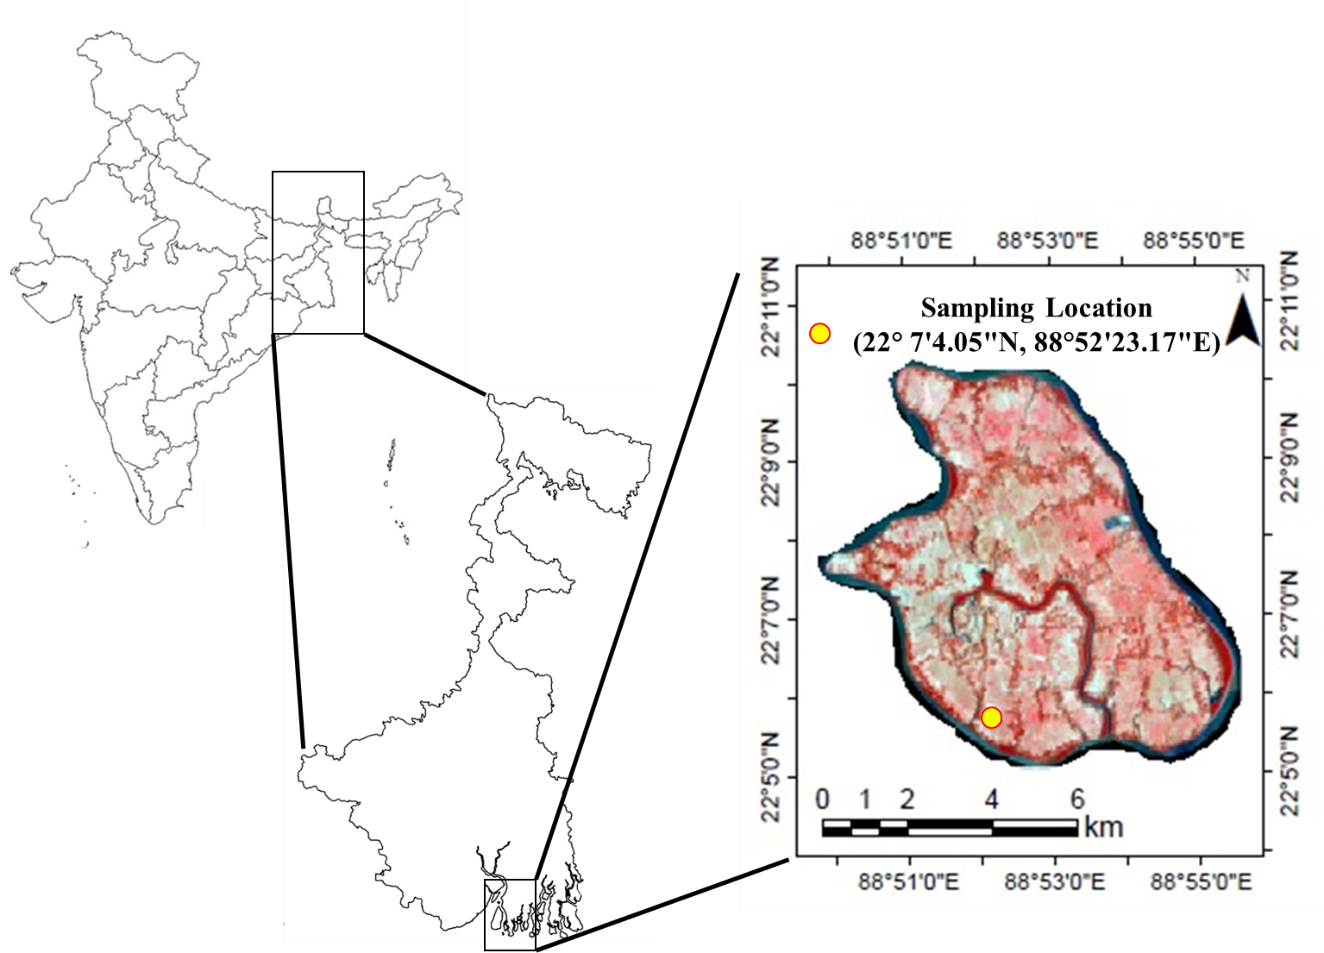


**Fig S1:** Sampling location


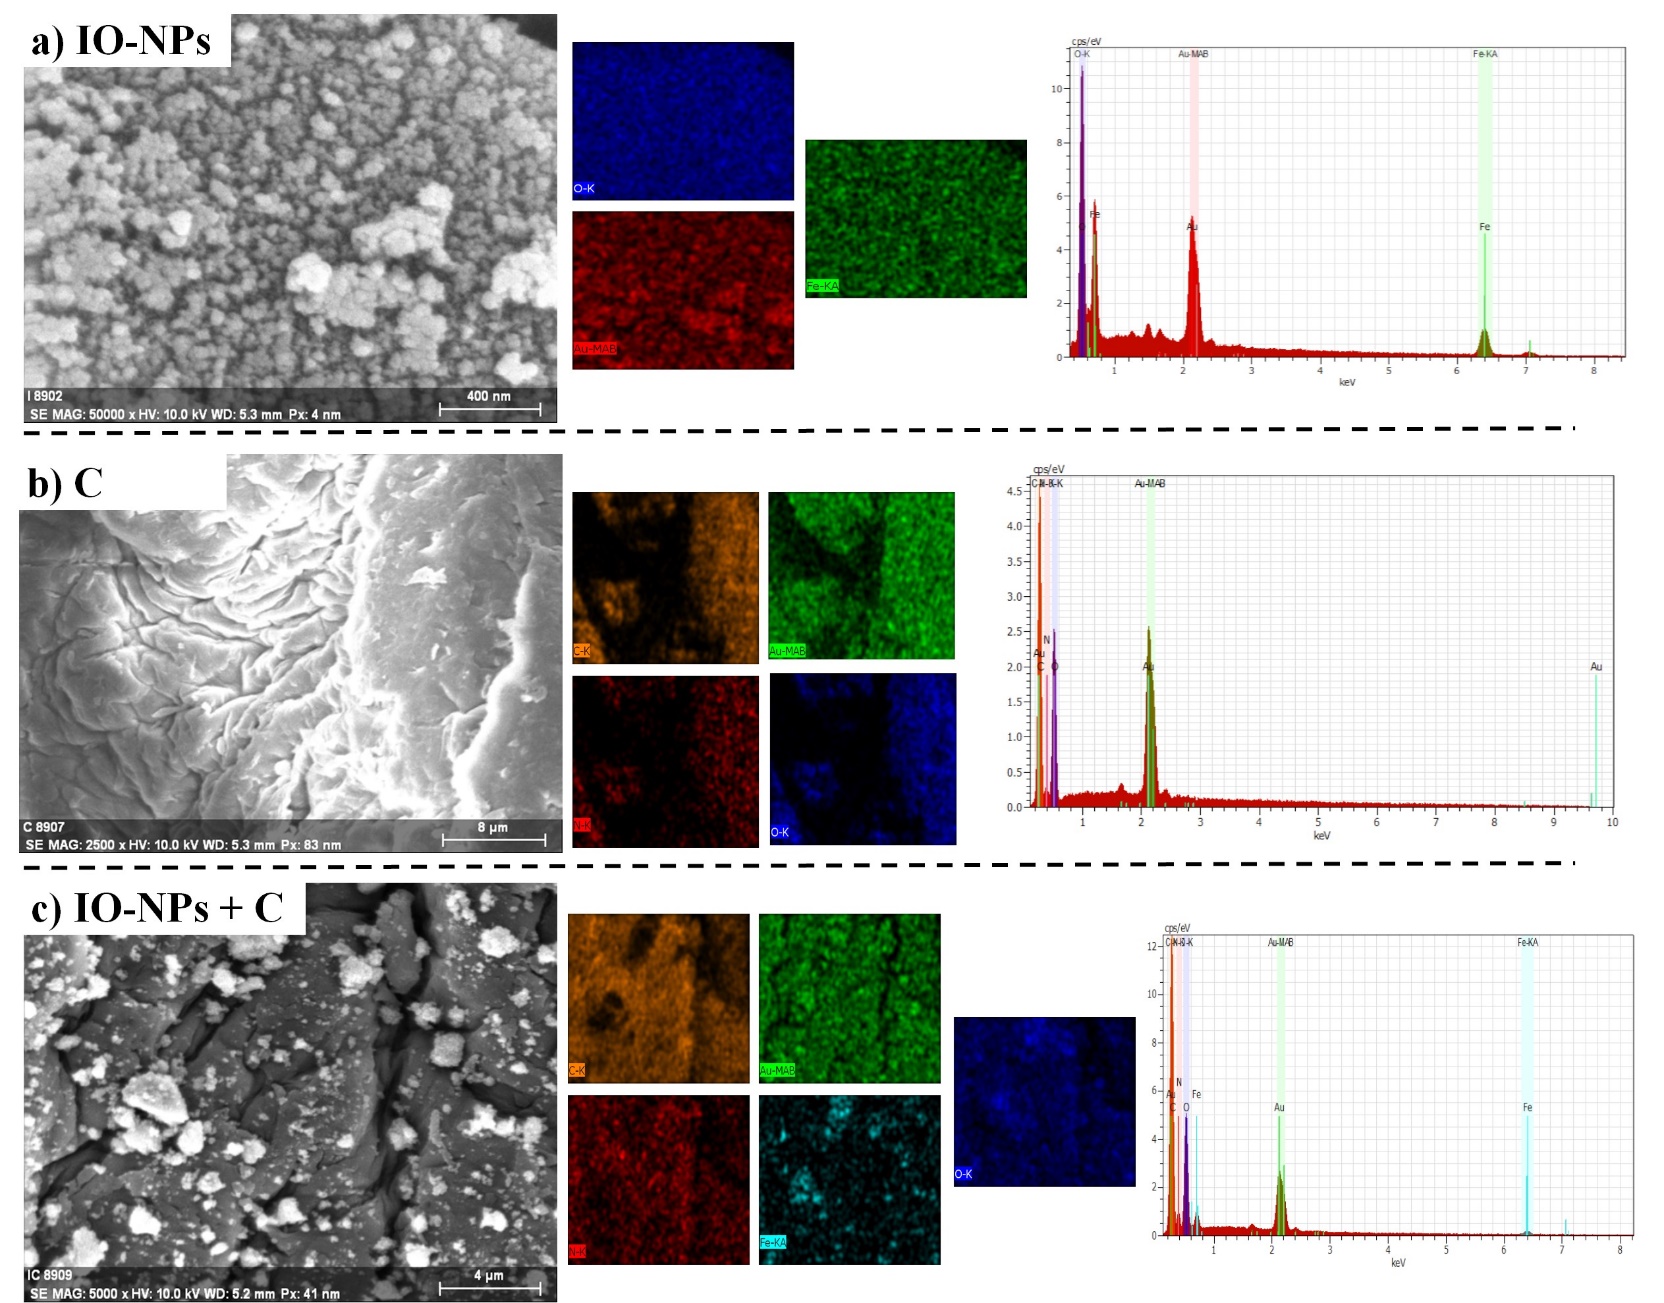


**Fig S2:** SEM-EDX mapping of a) IO-NPs b) C – Chitosan c) IO-NPs+C

| Fitted models | Equation | Parameters and significance |
| --- | --- | --- |
| Kinetic models | | |
| Pseudo 1st order |  | qe = Equilibrium sorption capacity (mg/g)  qt = Sorption capacity at time= t (mg/g)  K1, K2 are respective rate constants  c= resistance in mass transfer |
| Pseudo 2nd order |  |
| Isotherm models | | |
| Langmuir |  | Ci (mg/L)= Initial concentration  Ce (mg/L) = equilibrium concentration,  qe = sorption capacity at equilibrium (mg/g),  qm = obtained maximum sorption capacity (mg/g) and  KL, Kf are Langmuir (L/mg), Freundlich (mg/g) (L/mg)1/n |
| Freundlich |  |
| Thermodynamic equations | | |
| Gibbs free energy | ΔG= -RTlnKL | *R* is the universal gas constant (8.314 J K-1 mol-1); *T* is the absolute temperature (Kelvin)  KL= Ca/Ce  Ca= (Ce-Ci)/Ce  ΔG= Gibbs free energy  ΔS= entropy  ΔH= enthalpy of system |
| Vent Hoff’s equation | lnKL= ΔS/R-ΔH/RT |

**Table S1-** Fitted kinetic, isotherm and thermodynamic models (1-6).

**
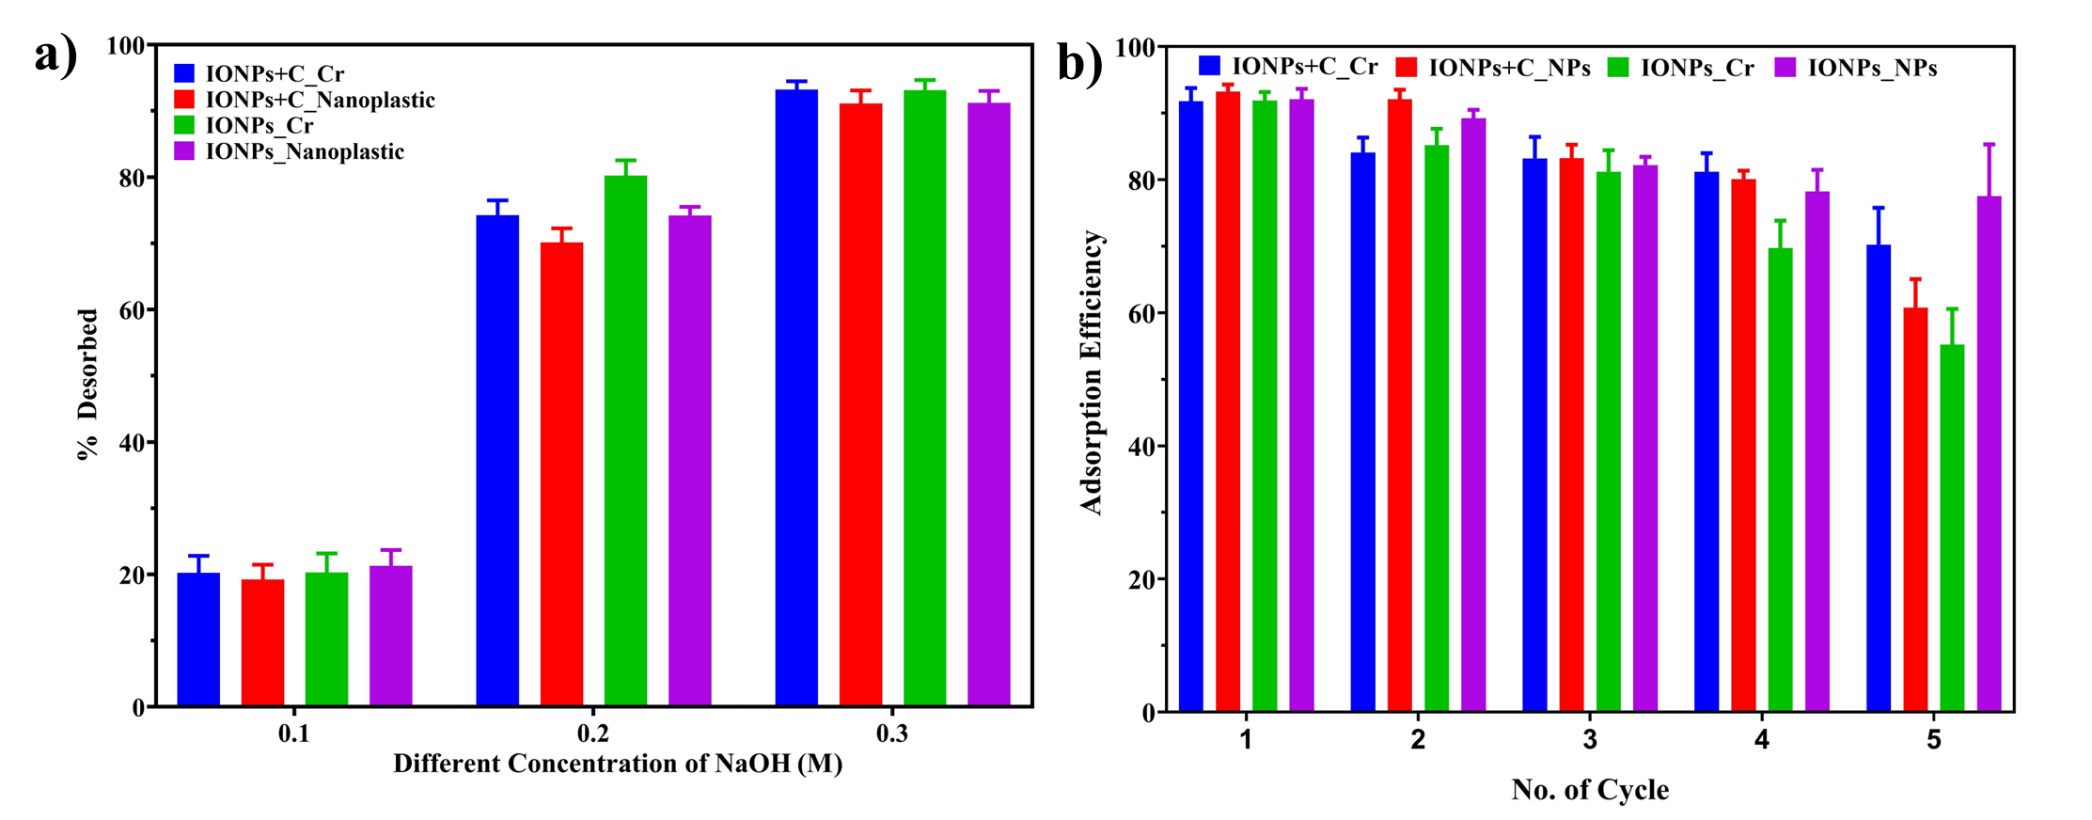
**

**Fig. S3:** a) Desorption of NPs and Cr ions in different concentration of NaOH d) adsorption efficiency of IO-NPs and IO-NPs+C for the adsorption of NPs and Cr ions. For all the experiments (p < 0.0001; two-way ANOVA and Tukey’s multiple comparisons test)

**
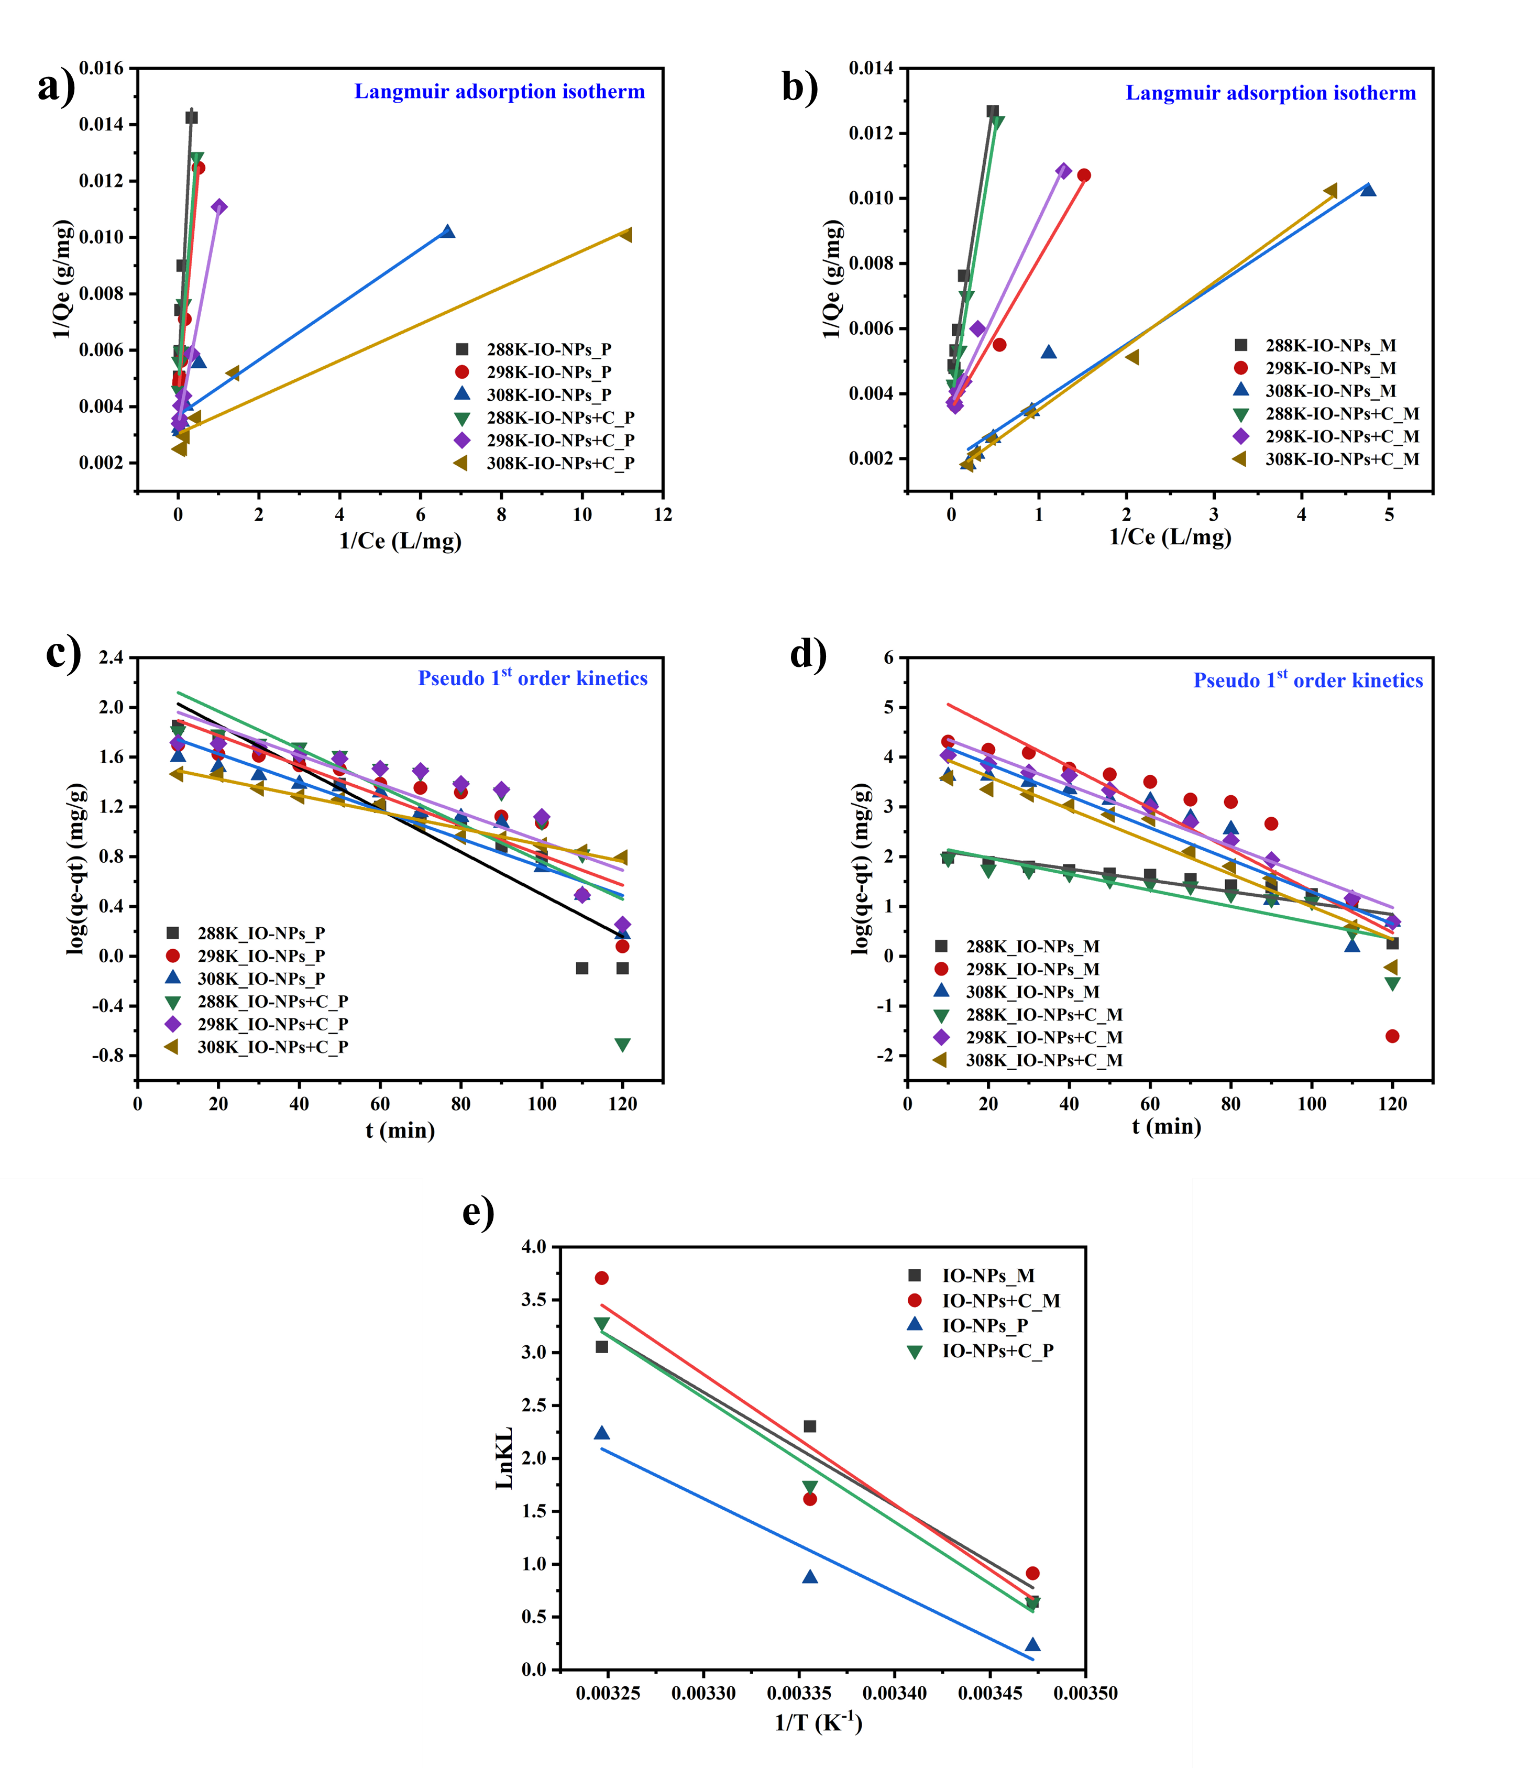
**

**Fig S4:** Comparative analysis of the Isotherm, Kinetics and Thermodynamics parameters for the adsorption of NPs and Cr ions by mycosynthesized IO-NPs and IO-NPs+C

**Table S2:** CCD for adsorption of NPs and Cr by IO-NPs+C.

| Sl No | **Variables** | | | | **Response 1** | | **Response 2** | |
| --- | --- | --- | --- | --- | --- | --- | --- | --- |
| **Actual** | **Predicted** | **Actual** | **Predicted** |
| ***A:***  ***adsorbent dose***  (mg/L) | ***B:***  ***temp***  (°C) | ***C:***  ***pH*** | ***D:***  ***time***  (min) | **% Cr removed** | | **% NPs removed** | |
| 1 | 75 | 25 | 5.5 | 90 | *85.21* | 85.47841 | *93.12* | 93.15991 |
| 2 | 100 | 15 | 3 | 120 | *60.78* | 61.84763 | *63.21* | 62.57896 |
| 3 | 100 | 15 | 8 | 120 | *35.23* | 34.99773 | *36.14* | 36.81021 |
| 4 | 50 | 15 | 8 | 60 | *5.12* | 5.274534 | *13.22* | 12.85679 |
| 5 | 75 | 25 | 5.5 | 90 | *85.21* | 85.47841 | *93.12* | 93.15991 |
| 6 | 50 | 35 | 3 | 60 | *89.21* | 89.20703 | *91.22* | 91.33974 |
| 7 | 75 | 25 | 5.5 | 90 | *85.21* | 85.47841 | *93.12* | 93.15991 |
| 8 | 100 | 35 | 8 | 120 | *76.13* | 76.27533 | *78.15* | 77.64441 |
| 9 | 50 | 35 | 8 | 60 | *65.11* | 64.47213 | *69.86* | 69.88599 |
| 10 | 75 | 5 | 5.5 | 90 | *1.11* | 0.989908 | *2.23* | 2.611215 |
| 11 | 100 | 35 | 3 | 120 | *98.12* | 97.73023 | *99.11* | 100.2632 |
| 12 | 75 | 25 | 5.5 | 90 | *85.21* | 85.47841 | *93.12* | 93.15991 |
| 13 | 75 | 25 | 5.5 | 30 | *21.11* | 21.72496 | *28.23* | 28.25448 |
| 14 | 50 | 15 | 3 | 120 | *47.12* | 46.92858 | *45.53* | 45.55148 |
| 15 | 50 | 35 | 8 | 120 | *70.23* | 70.22128 | *71.26* | 71.60193 |
| 16 | 100 | 15 | 8 | 60 | *20.11* | 19.41358 | *22.23* | 21.83928 |
| 17 | 75 | 25 | 10.5 | 90 | *38.22* | 38.57551 | *41* | 40.89491 |
| 18 | 50 | 35 | 3 | 120 | *90.11* | 91.23618 | *91.23* | 91.01568 |
| 19 | 100 | 15 | 3 | 60 | *50.21* | 49.98348 | *49.2* | 49.64803 |
| 20 | 50 | 15 | 3 | 60 | *35.12* | 35.40443 | *37.56* | 37.46054 |
| 21 | 75 | 25 | 5.5 | 150 | *40.12* | 39.33826 | *43.11* | 42.90135 |
| 22 | 100 | 35 | 8 | 60 | *70.23* | 70.18618 | *70.32* | 71.08848 |
| 23 | 75 | 45 | 5.5 | 90 | *96.12* | 96.07011 | *97.89* | 97.32462 |
| 24 | 100 | 35 | 3 | 60 | *95.23* | 95.36108 | *96.12* | 95.74723 |
| 25 | 75 | 25 | 5.5 | 90 | *85.21* | 85.47841 | *93.12* | 93.15991 |
| 26 | 50 | 15 | 8 | 120 | *20.22* | 20.51868 | *23.22* | 22.98773 |
| 27 | 75 | 25 | 5.5 | 90 | *85.21* | 85.47841 | *93.12* | 93.15991 |
| 28 | 25 | 25 | 5.5 | 90 | *78.92* | 78.51846 | *80.12* | 80.41293 |
| 29 | 125 | 25 | 5.5 | 90 | *98.92* | 99.15156 | *99.12* | 98.6429 |
| 30 | 75 | 25 | 3 | 90 | *95.21* | 93.09698 | *98.12* | 97.8021 |

**1. Final euation in terms of coded factor the removal of NPs and Cr by IO-NPs analysed in RSM interface:**

**%Cr Removed =** +85.47+5.16 × A+23.77 × B-12.90 × C+4.40 × D-2.11 × A × B -0.11 × A × C +0.085 × A × D +1.35 × B ×C -2.37 × B × D +0.93 × C × D +0.84 × A2 -9.24 × B2 -5.28 × C2 - 13.74 × D2 (S 3)

**%NPs Removed =** +93.16 +4.56 × A +23.68 × B -11.81 × C +3.66 × D -1.94 × A × B -0.80 × A × C +1.21 × A × D +0.79 × B × C -2.10 × B × D + 0.51 × C × D - 0.91 × A2 -10.80 × B2 -7.16 × C2 -14.40 × D2 (S 4)

Where A is IO-NPs+C dose, B is temperature, C is pH, and D is time.

**Table S3:** ANOVA for the interacting factors of RSM for NPs and Cr by IO-NPs+C

| **Adsorbent** | **Source** | **Sum of Squares** | **df** | **Mean Square** | **F Value** | **p-value Prob > F** |
| --- | --- | --- | --- | --- | --- | --- |
| Cr | Model | 26302.48 | 14 | 1878.749 | 2797.979 | < 0.0001 |
| A-Adsorbent Concentration | 638.6017 | 1 | 638.6017 | 951.0554 | < 0.0001 |
| B-Temp | 13560.31 | 1 | 13560.31 | 20195.07 | < 0.0001 |
| C-pH | 3120.165 | 1 | 3120.165 | 4646.794 | < 0.0001 |
| D-time | 464.816 | 1 | 464.816 | 692.2403 | < 0.0001 |
| AB | 70.98063 | 1 | 70.98063 | 105.7099 | < 0.0001 |
| AC | 0.1936 | 1 | 0.1936 | 0.288324 | 0.5992 |
| AD | 0.1156 | 1 | 0.1156 | 0.172161 | 0.6841 |
| BC | 29.10603 | 1 | 29.10603 | 43.34696 | < 0.0001 |
| BD | 90.15503 | 1 | 90.15503 | 134.2659 | < 0.0001 |
| CD | 13.8384 | 1 | 13.8384 | 20.60922 | 0.0004 |
| A2 | 19.6619 | 1 | 19.6619 | 29.28204 | < 0.0001 |
| B2 | 2382.434 | 1 | 2382.434 | 3548.106 | < 0.0001 |
| C2 | 455.8179 | 1 | 455.8179 | 678.8395 | < 0.0001 |
| D2 | 5269.138 | 1 | 5269.138 | 7847.212 | < 0.0001 |
| NPs | Model | 26798.61 | 14 | 1914.187 | 5939.756 | < 0.0001 |
| A-Adsorbent Concentration | 498.4994 | 1 | 498.4994 | 1546.853 | < 0.0001 |
| B-Temp | 13455.92 | 1 | 13455.92 | 41753.98 | < 0.0001 |
| C-pH | 2614.695 | 1 | 2614.695 | 8113.449 | < 0.0001 |
| D-time | 321.7873 | 1 | 321.7873 | 998.5119 | < 0.0001 |
| AB | 60.5284 | 1 | 60.5284 | 187.8207 | < 0.0001 |
| AC | 10.27202 | 1 | 10.27202 | 31.87428 | < 0.0001 |
| AD | 23.4256 | 1 | 23.4256 | 72.69007 | < 0.0001 |
| BC | 9.9225 | 1 | 9.9225 | 30.7897 | < 0.0001 |
| BD | 70.81222 | 1 | 70.81222 | 219.7316 | < 0.0001 |
| CD | 4.1616 | 1 | 4.1616 | 12.91352 | 0.0027 |
| A2 | 23.0207 | 1 | 23.0207 | 71.43367 | < 0.0001 |
| B2 | 3255.635 | 1 | 3255.635 | 10102.3 | < 0.0001 |
| C2 | 839.755 | 1 | 839.755 | 2605.775 | < 0.0001 |
| D2 | 5786.323 | 1 | 5786.323 | 17955.07 | < 0.0001 |

**Table S4:** R2 and Adequate Precision for RSM model for NPs and Cr by IO-NPs+C

| **IO-NPs from**  **fungal isolates** | **Adsorbent** | **R2** | **Adjusted R2** | **Predicted R2** | **Adequate Precision** |
| --- | --- | --- | --- | --- | --- |
| ***Aspergillus iranicus***  **(STSP9)** | Cr | 0.999 | 0.999 | 0.998 | 169.41 |
| NPs | 0.999 | 0.999 | 0.998 | 243.26 |

**
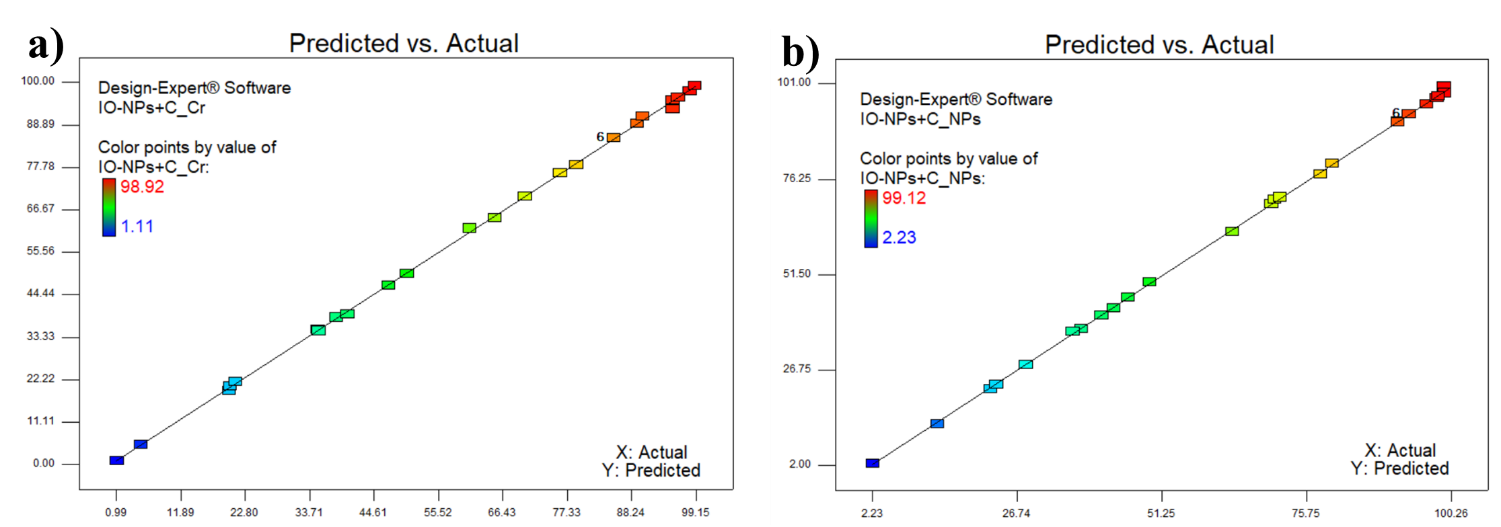
**

**Fig. S5:** RSM optimization of Cr ions and NPs adsorption (a - b) on IO-NPs+C shows predicted % removal vs experimental % removal as calculated from RSM analysis.

**
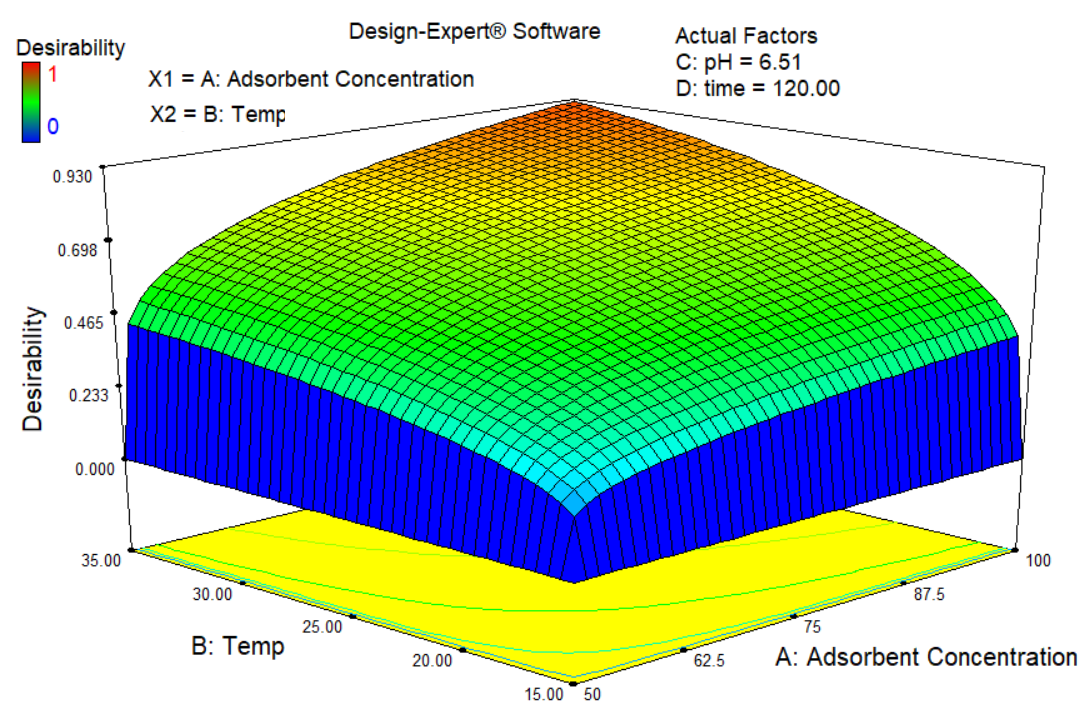
**

**Fig. S6:** RSM optimization of Cr ions and NPs adsorption using desirability function.


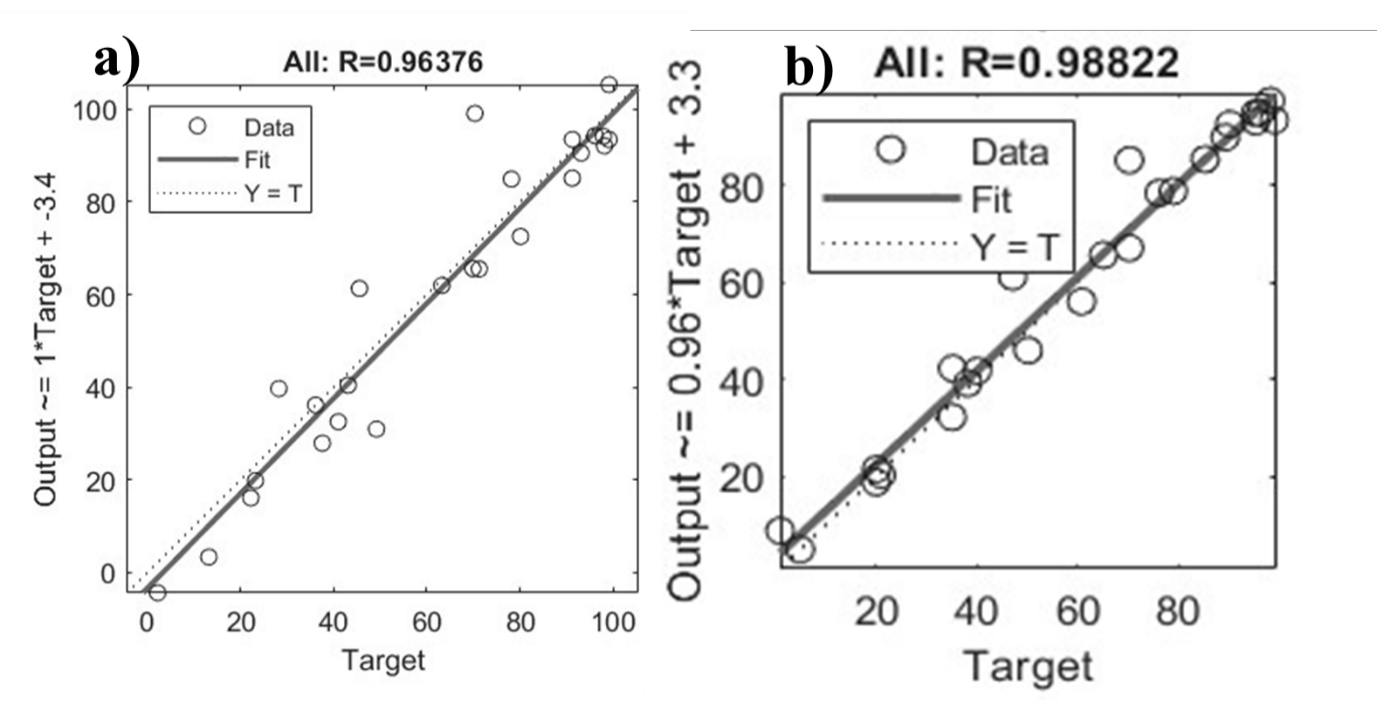
**Fig. S7:** ANN modelling of NPs and Cr ions adsorption **(a - b)** on IO-NPs+C shows predicted % removal vs. experimental % removal as calculated from ANN analysis.

**Table S5:** R2 of ANN model for simultaneous NPs and Cr ion removal using IO-NPs+C

| **Algorithm selected for hidden layer** | **Selected Functions** | | | **IO-NPs**  **from**  **fungal isolates** | **Correlation coefficient (R2) for heavy metal ion adsorption** | |
| --- | --- | --- | --- | --- | --- | --- |
| **Output Layer** | **Transfer 1** | **Transfer 2** | **NP** | **Cr** |
| **Levenberg-Marquardt backpropagation** | **Trainlm** | **Poslin** | ***Aspergillus iranicus***  **(STSP9)** | 0.963 | 0.988 |

**2. COPR water quality**

**Table S6:** General characteristics of COPR Cr-contaminated groundwater

| pH | 7.6 | Temperature (°C) | 21.8 |
| --- | --- | --- | --- |
| ORP (mV) | -38.3 | EC (µs/cm2) | 1368 |
| TDS (mg/L) | 684 |  |  |
| Cr(total) (mg/L) | 12.68± 1.2 | Cr(VI) (mg/L) | 10.96± 1.01 |
| Borewell Depth | 40 ft |  |  |
| SO4 (mg/L) | 172 | NO3 (mg/L) | 5.26 |
| Total Alkalinity (mg/L) | 210 | Total Hardness (mg/L) | 170 |
| **Other Metal/metalloid content (mg/L)** | | | |
| Na | 129.48 ± 1.2 | Mg | 52.68 ± 0.3 |
| K | 12.46 ± 0.1 | Mn | 0.018 ± 0.01 |
| Co | 0.015 ± 0.01 | Cu | 0.003 ± 0.001 |
| Zn | 0.037 ± 0.01 | As | 0.003 ± 0.001 |
| Ca | 81.54 ± 1.9 | Pb | 0.011 ± 0.001 |
| Fe | 0.015 ± 0.01 | Hg | 0.007 ± 0.001 |

References:

1. Simonin, J. P., & Bouté, J. (2016). Intraparticle diffusion-adsorption model to describe liquid/solid adsorption kinetics. *Revista mexicana de ingeniería química*, *15*(1), 161-173.
2. Wamba, A. G., Lima, E. C., Ndi, S. K., Thue, P. S., Kayem, J. G., Rodembusch, F. S., & De Alencar, W. S. (2017). Synthesis of grafted natural pozzolan with 3-aminopropyltriethoxysilane: preparation, characterization, and application for removal of Brilliant Green 1 and Reactive Black 5 from aqueous solutions. *Environmental Science and Pollution Research*, *24*, 21807-21820.
3. Liu, Y., & Shen, L. (2008). A general rate law equation for biosorption. *Biochemical Engineering Journal*, *38*(3), 390-394.
4. Boparai, H. K., Joseph, M., & O’Carroll, D. M. (2011). Kinetics and thermodynamics of cadmium ion removal by adsorption onto nano zerovalent iron particles. *Journal of hazardous materials*, *186*(1), 458-465.
5. Ayawei, N., Ebelegi, A. N., & Wankasi, D. (2017). Modelling and interpretation of adsorption isotherms. *Journal of chemistry*, *2017*(1), 3039817.
6. Chen, X. (2015). Modeling of experimental adsorption isotherm data. *information*, *6*(1), 14-22.
